# Supplementary material for: A cognitive profile of multi-sensory imagery, memory and dreaming in aphantasia
Source: PubMed Central journal article supplement (PMC7308278; doi:10.1038/s41598-020-65705-7), 2020-06-22
Supplement: 41598_2020_65705_MOESM1_ESM.pdf [file 41598_2020_65705_MOESM1_ESM.pdf]

# SUPPLEMENTARY INFORMATION

A cognitive profile of multi-sensory imagery, memory and dreaming in aphantasia

Alexei J. Dawes<sup>1\*</sup>,

Rebecca Keogh<sup>1</sup>,

Thomas Andrillon<sup>1&2</sup>,

& Joel Pearson<sup>1</sup>

1. School of Psychology, The University of New South Wales, Sydney, New South Wales, Australia.
2. School of Psychological Sciences and Turner Institute for Brain and Mental Health, Monash University, Melbourne, Victoria, Australia.

## **\*Corresponding Author**

E-mail: alexei.dawes@unsw.edu.au

Address: Future Minds Lab, School of Psychology, Level 16 Matthews  
Building, University of New South Wales, Sydney, Australia, 2052

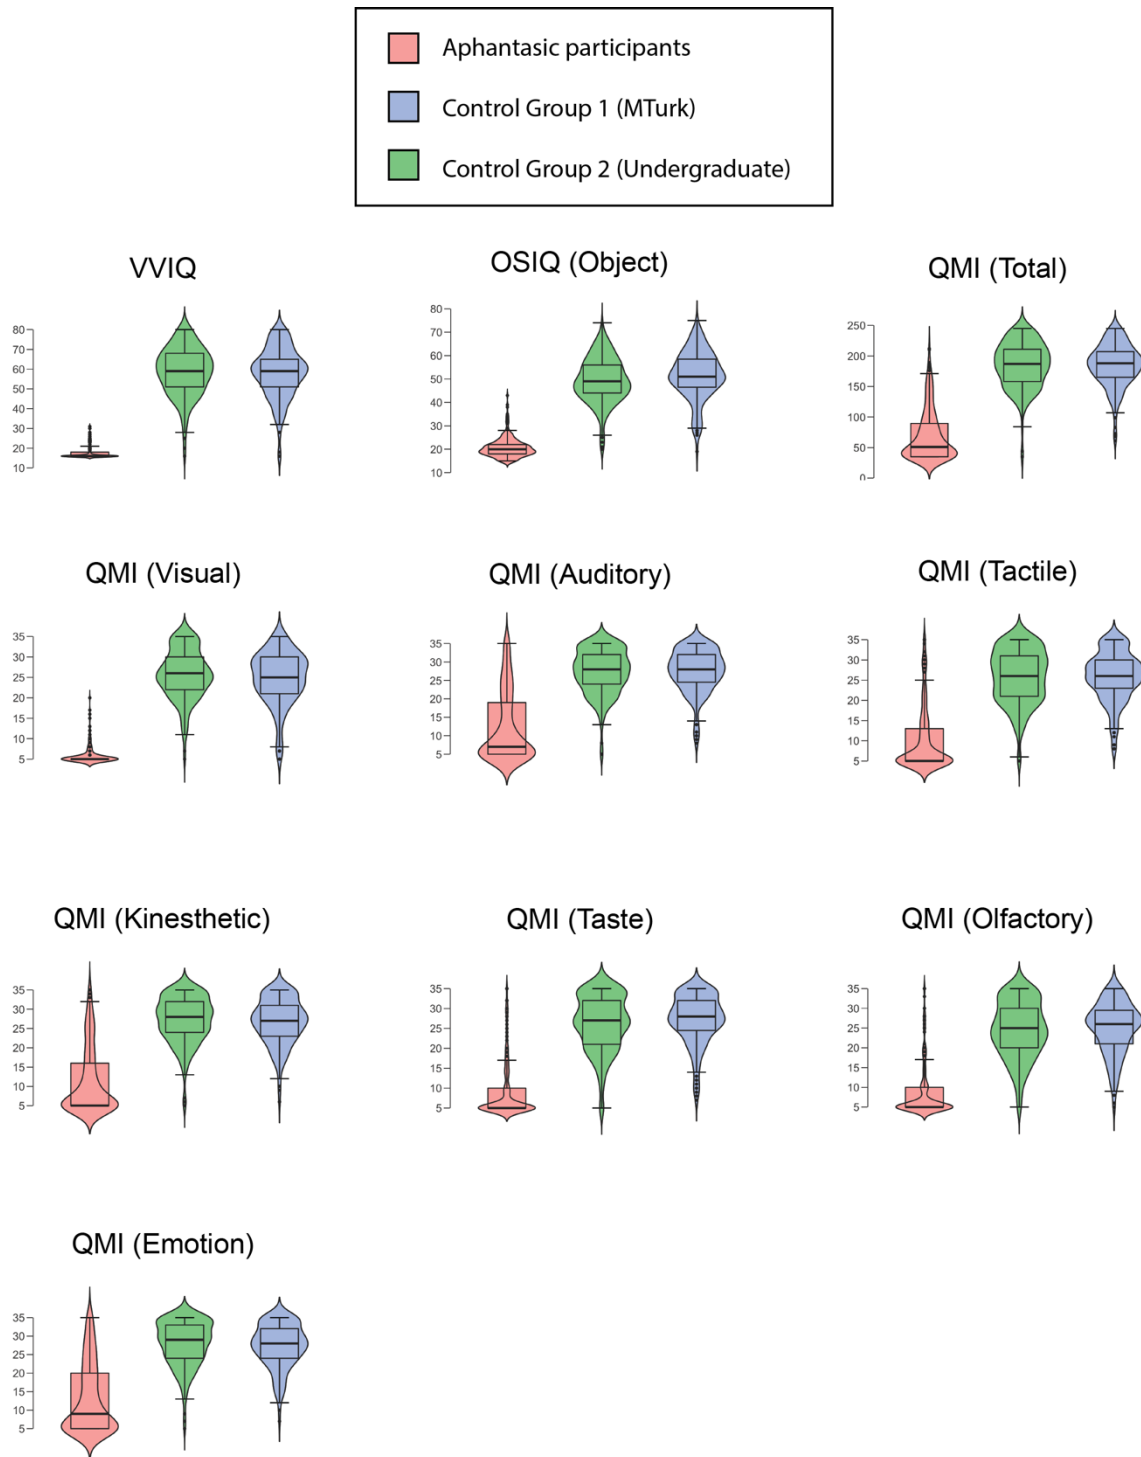

*Figure S1.* Average total scores as violin plots for imagery questionnaires split by imagery group: Aphantasic group (red), main control group (blue; MTurk responders), and second control group (green; undergraduate students). Error bars represent interquartile range, outliers are represented as black data points.

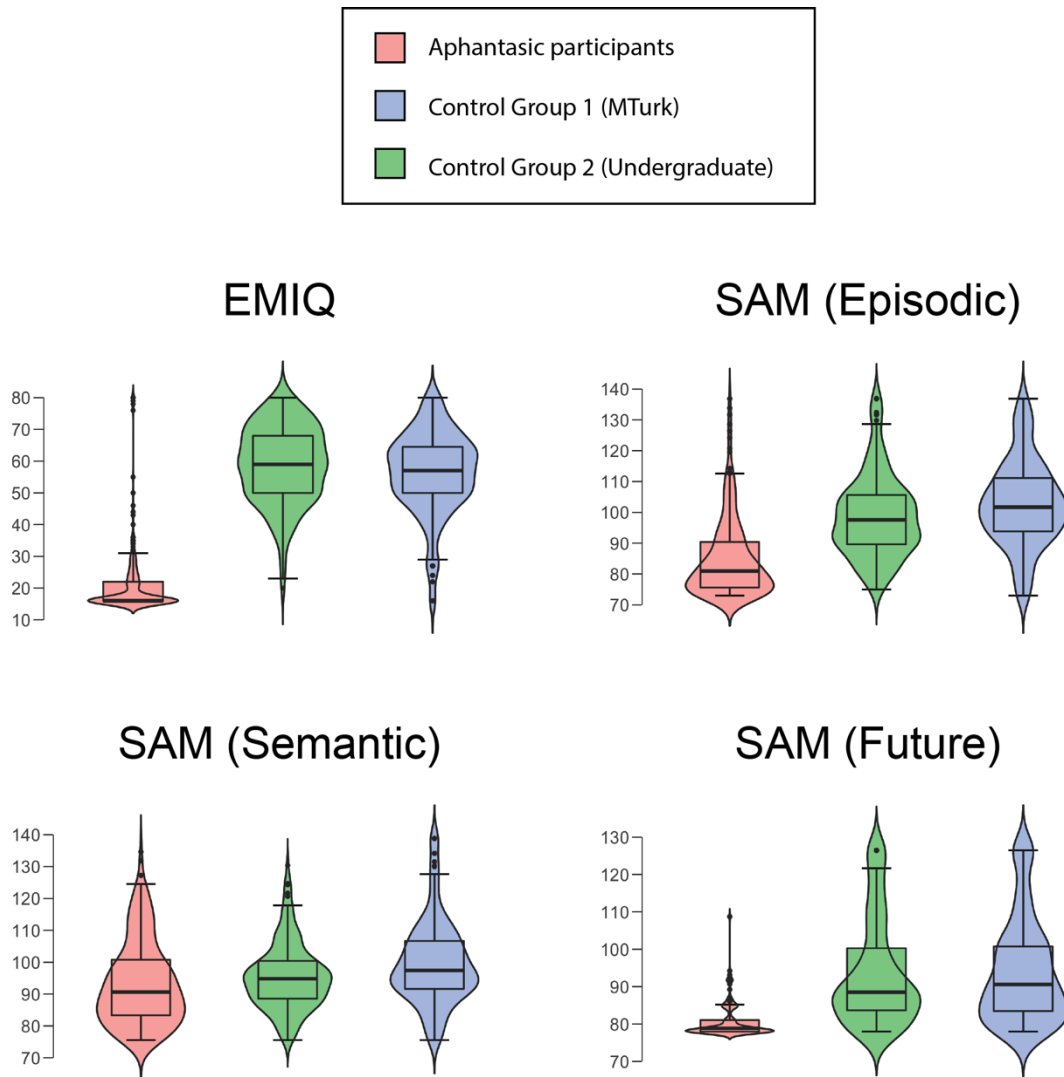

*Figure S2.* Average total scores as violin plots for memory questionnaires split by imagery group: Aphantasic group (red), main control group (blue; MTurk responders), and second control group (green; undergraduate students). Error bars represent interquartile range, outliers are represented as black data points.

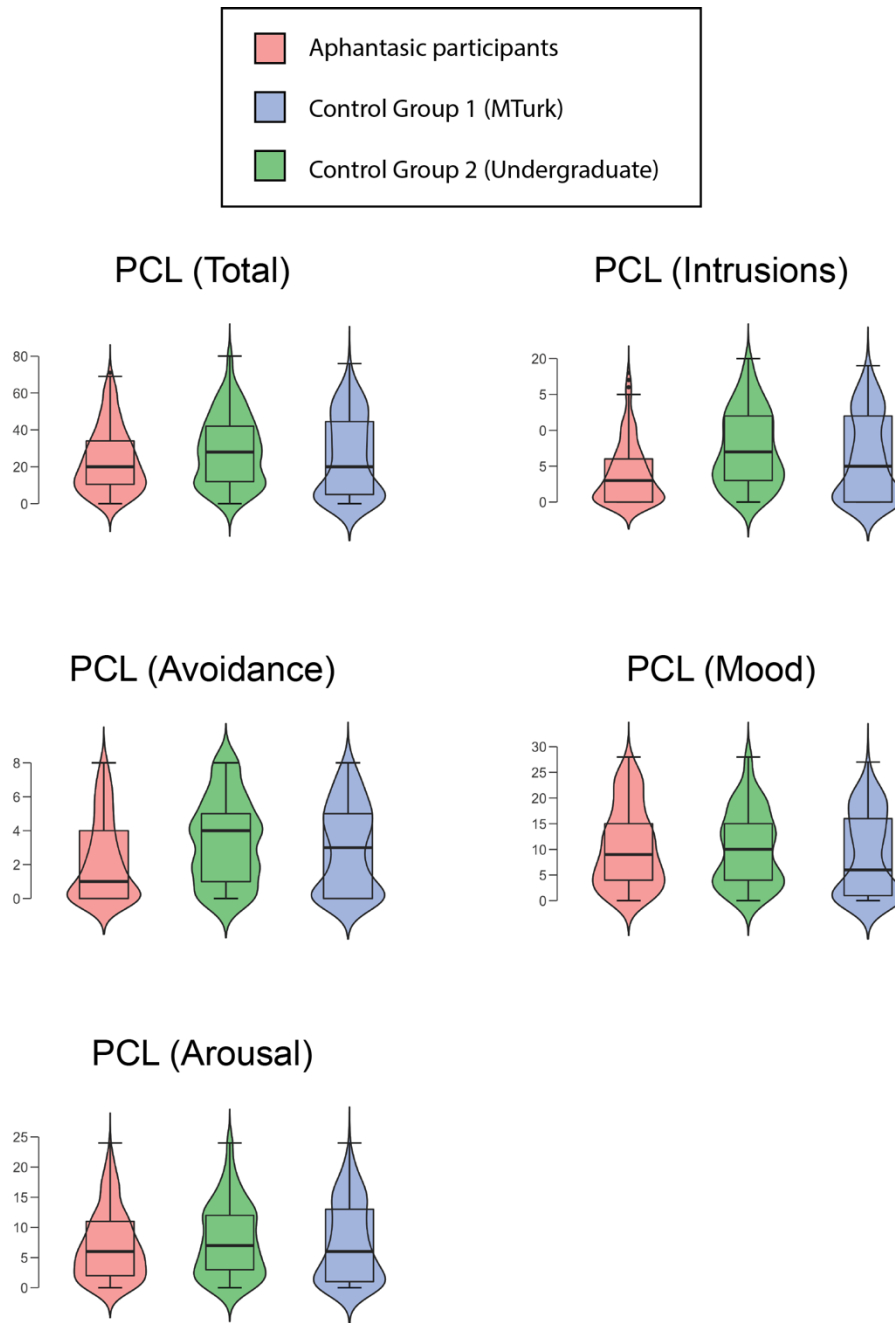

*Figure S3.* Average scores as violin plots for PCL-5 scale split by imagery group: Aphantasic group (red), main control group (blue; MTurk responders), and second control group (green; undergraduate students). Error bars represent interquartile range, outliers are represented as black data points.

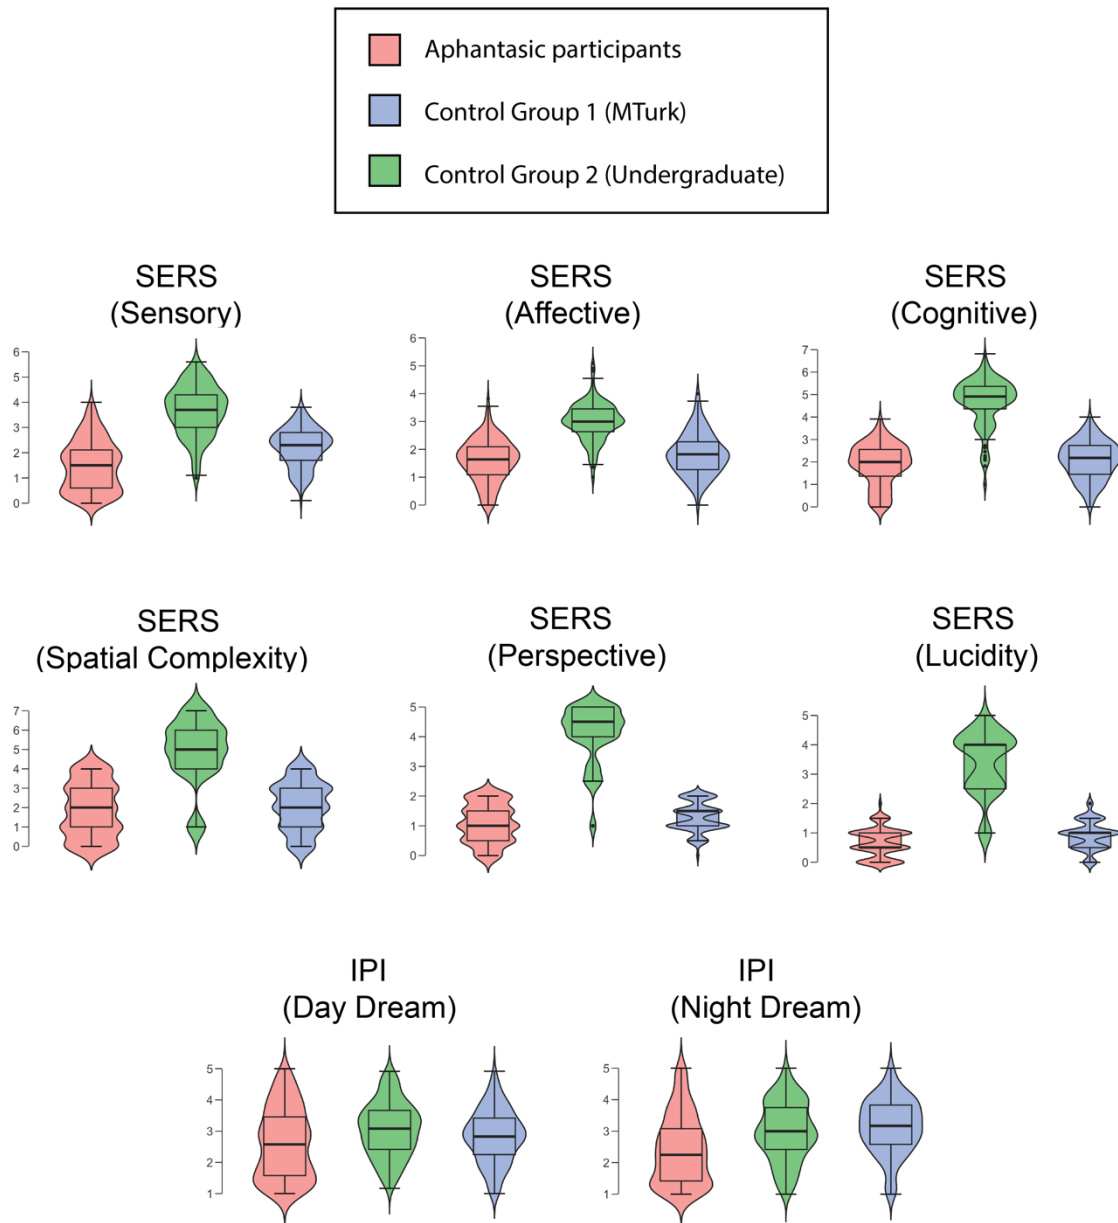

*Figure S4.* Average scores as violin plots for mind-wandering and dream questionnaires split by imagery group: Aphantasic group (red), main control group (blue; MTurk responders), and second control group (green; undergraduate students). Error bars represent interquartile range, outliers are represented as black data points.

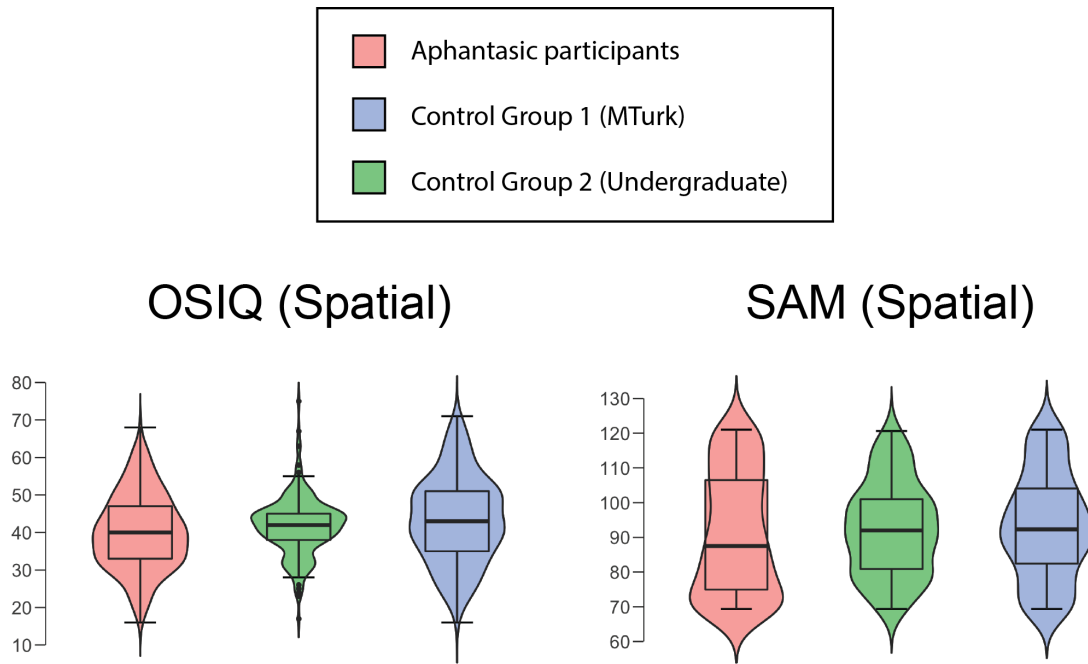

*Figure S5.* Average scores as violin plots for spatial questionnaires split by imagery group: Aphantasic group (red), main control group (blue; MTurk responders), and second control group (green; undergraduate students). Error bars represent interquartile range, outliers are represented as black data points.

## VVIQ

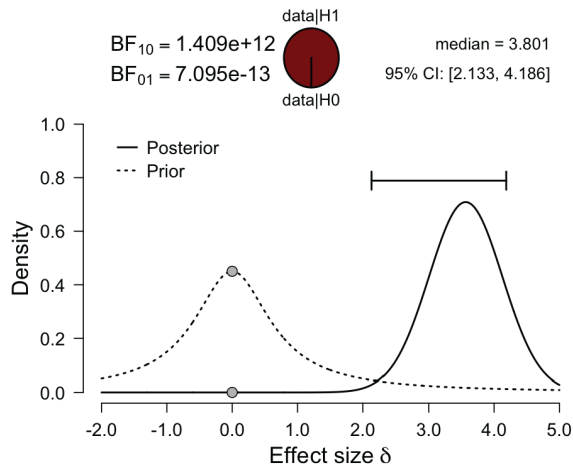

## OSIQ (Object)

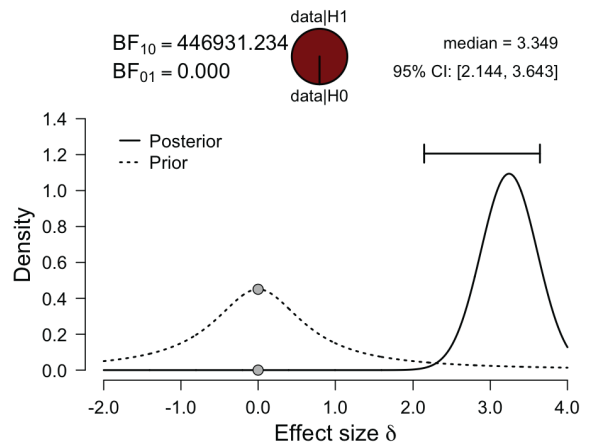

## QMI (Total)

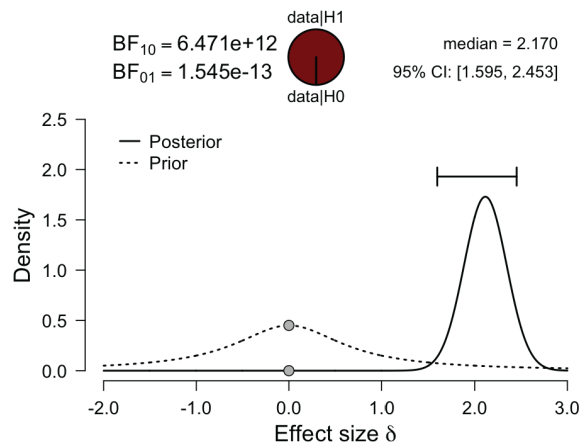

## QMI (Tactile)

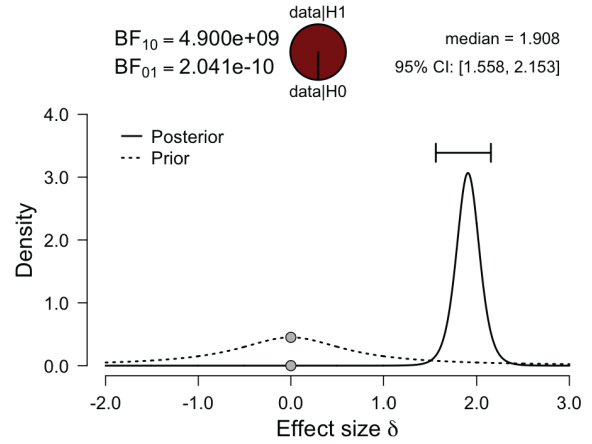

## QMI (Visual)

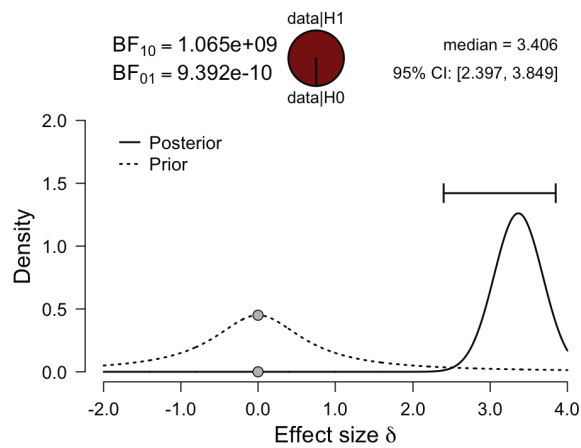

## QMI (Auditory)

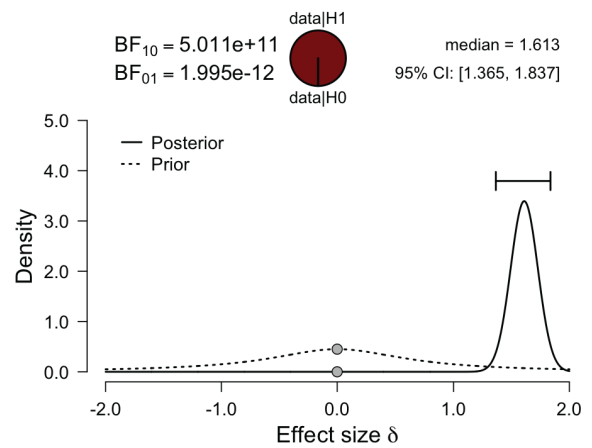

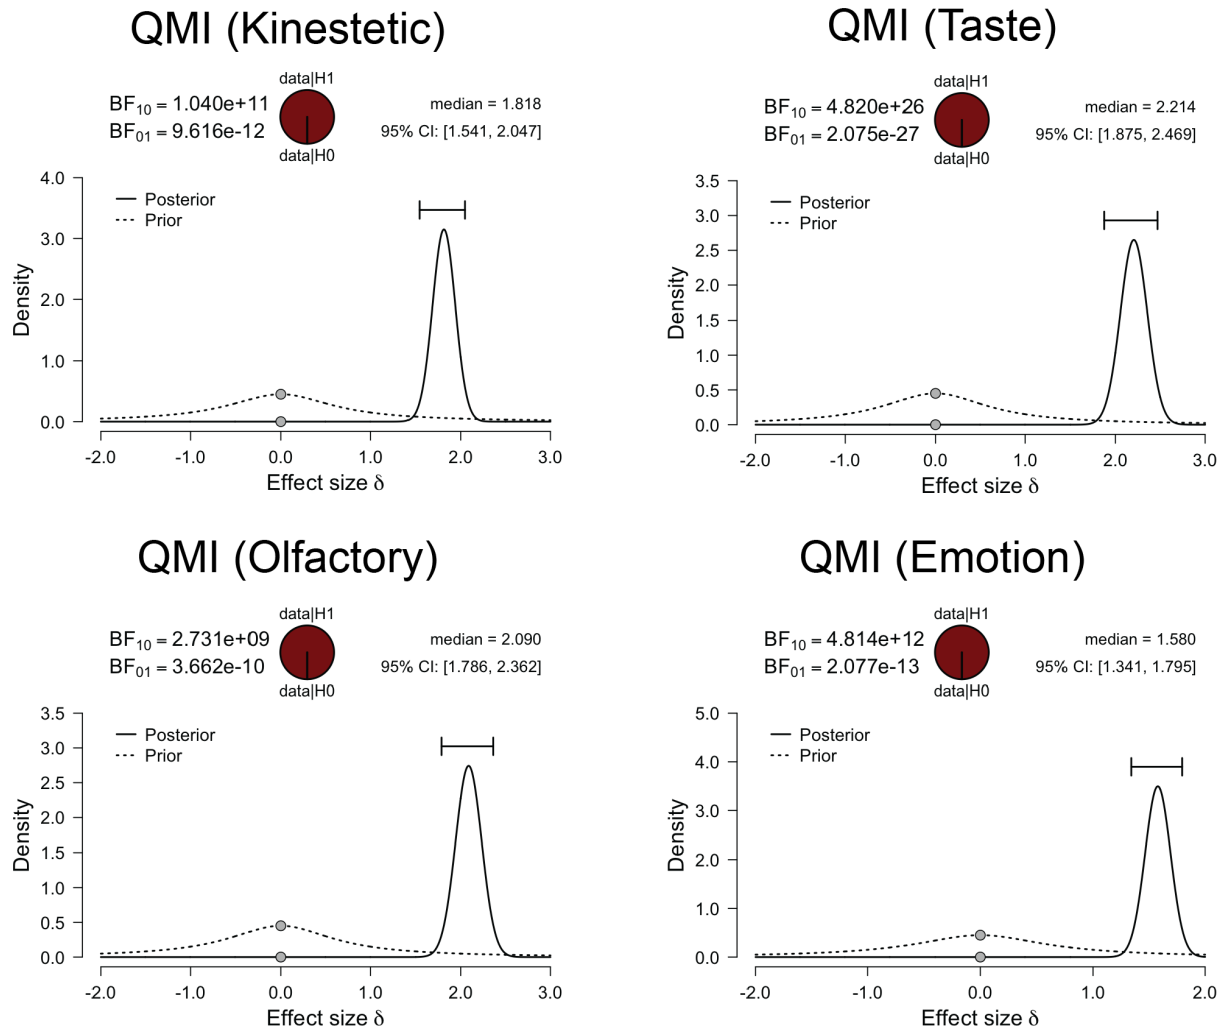

Figure S6. Prior and posterior plots for all imagery questionnaires. Data shows Mann-Whitney 2-sided t-tests, Cauchy = .707



## EMIQ

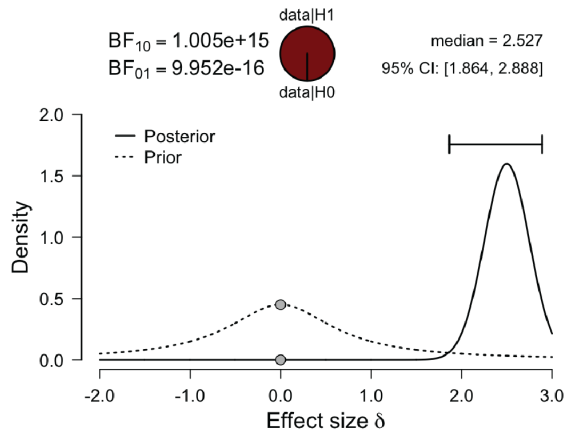

## SAM (Total)

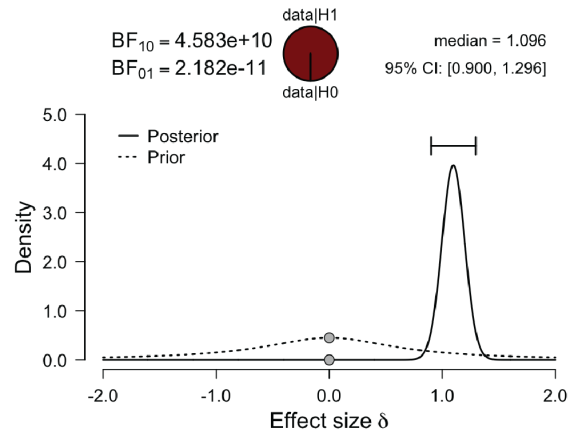

## SAM (Episodic)

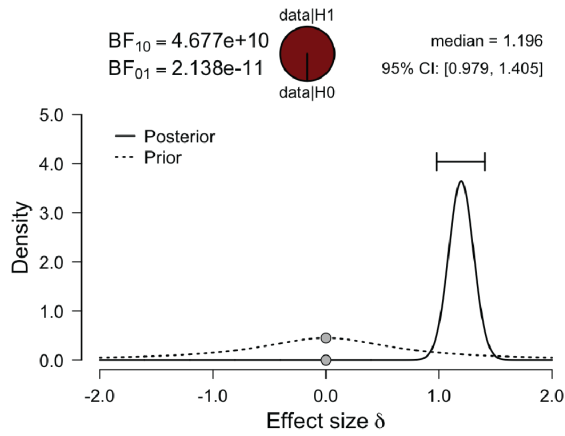

## SAM (Future)

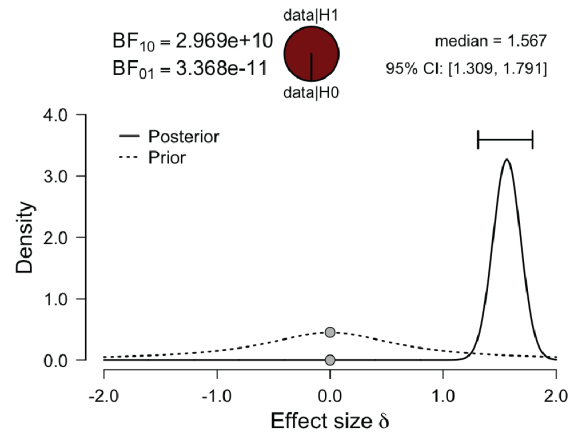

## SAM (Factual)

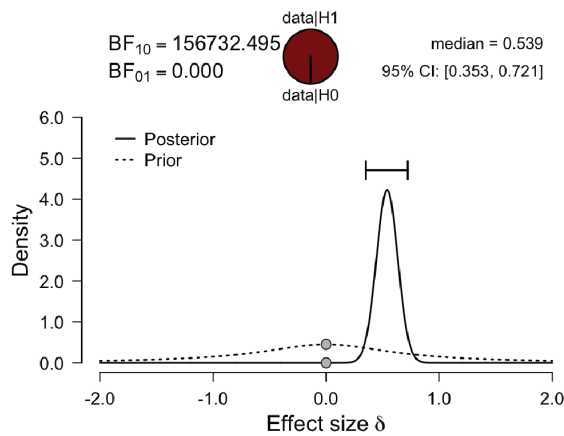

Figure S7. Prior and posterior plots for all memory questionnaires. Data shows Mann-Whitney 2-sided t-tests, Cauchy = .707

## PCL (Total)

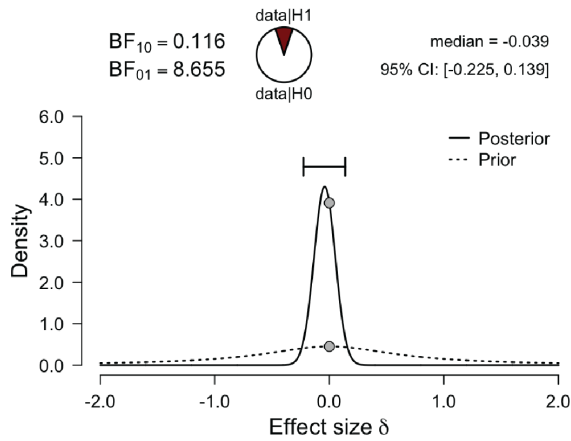

## PCL (Intrusions)

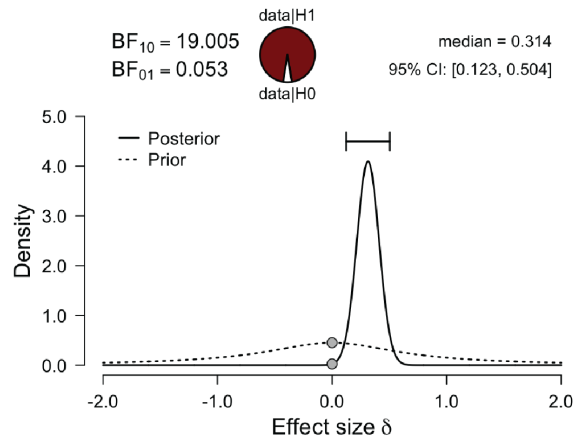

## PCL (Avoidance)

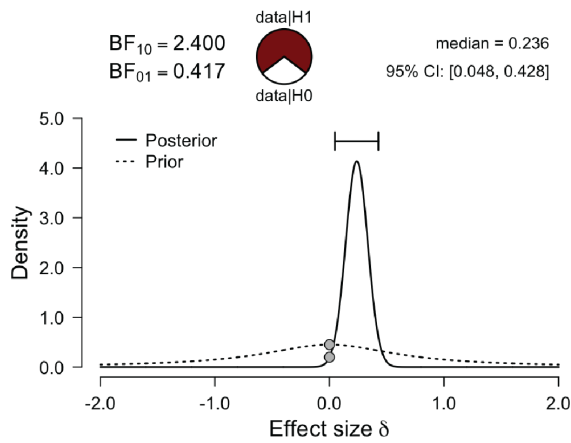

## PCL (Mood)

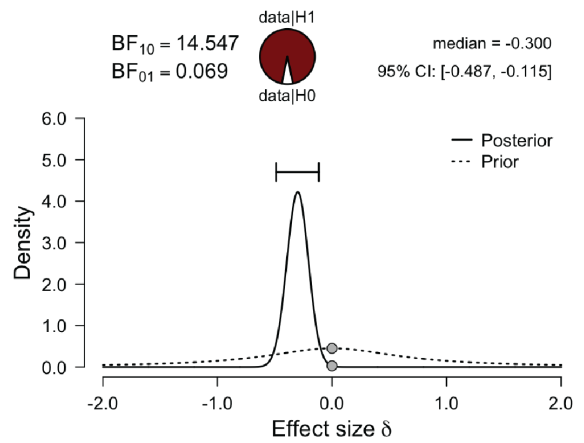

## PCL (Arousal)

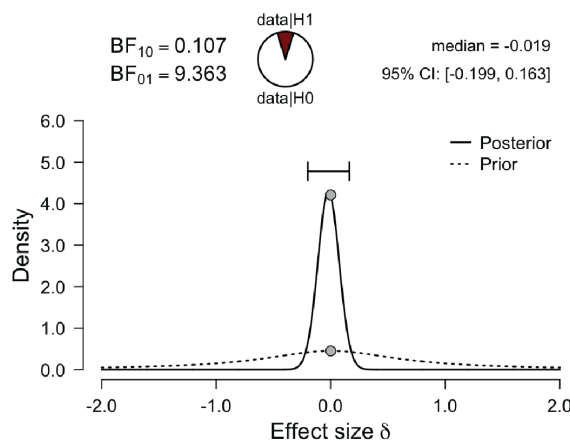

Figure S8. Prior and posterior plots for the PCL-5 scale. Data shows Mann-Whitney 2-sided t-tests, Cauchy = .707

## Dream (Sensory)

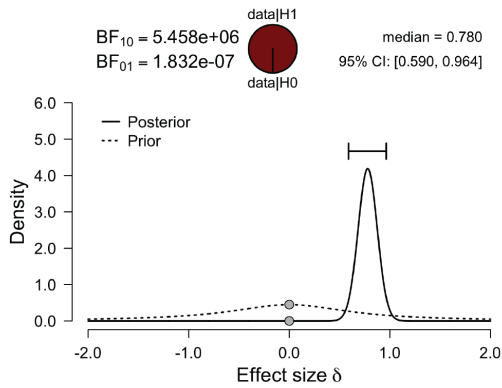

## Dream (Affective)

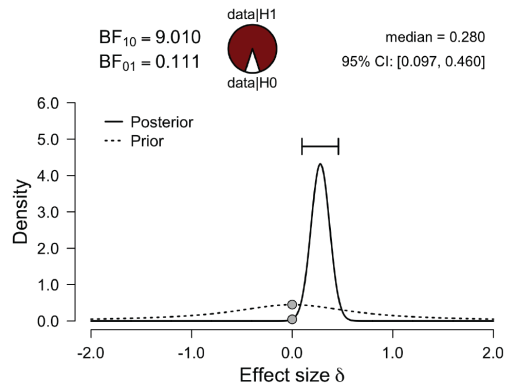

## Dream (Perspective)

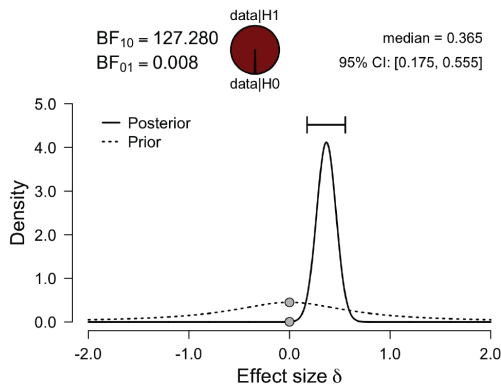

## Dream (Lucidity)

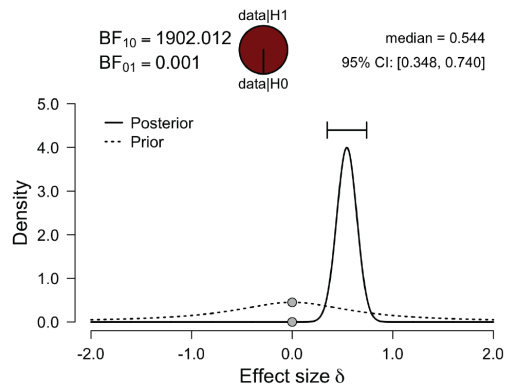

## Dream (Cognitive)

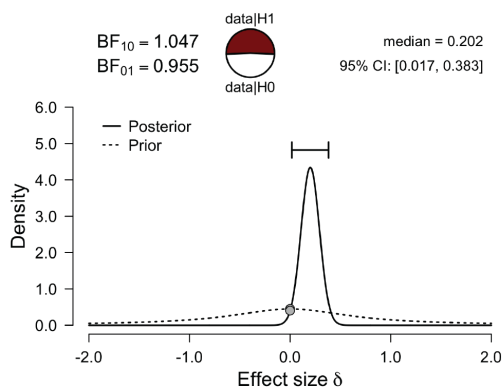

## Dream (Spatial Complexity)

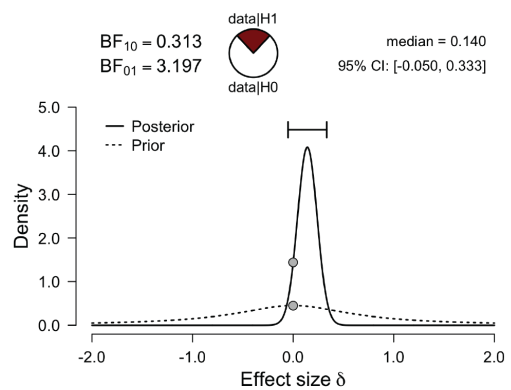

## IPI (Day Dream)

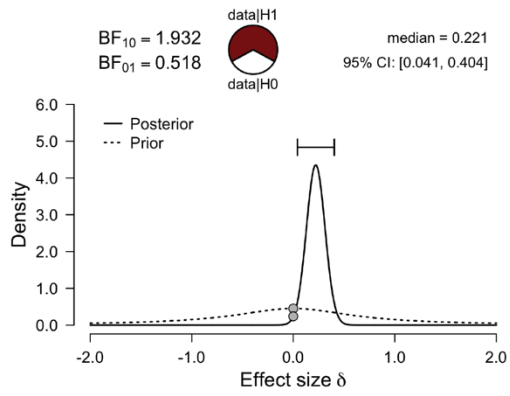

## IPI (Night Dream)

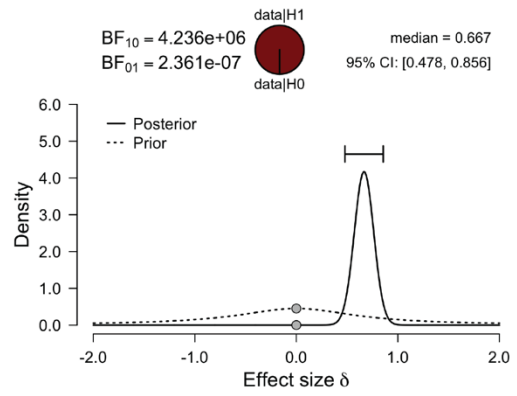

*Figure S9.* Prior and posterior plots for all mind-wandering and dream questionnaires. Data shows Mann-Whitney 2-sided t-tests, Cauchy = .707

## OSIQ (Spatial)

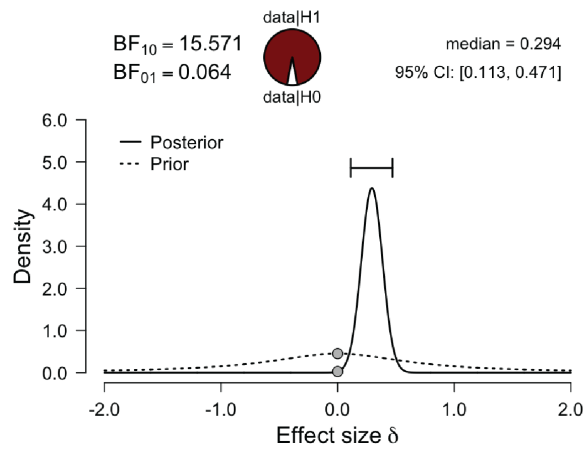

## SAM (Spatial)

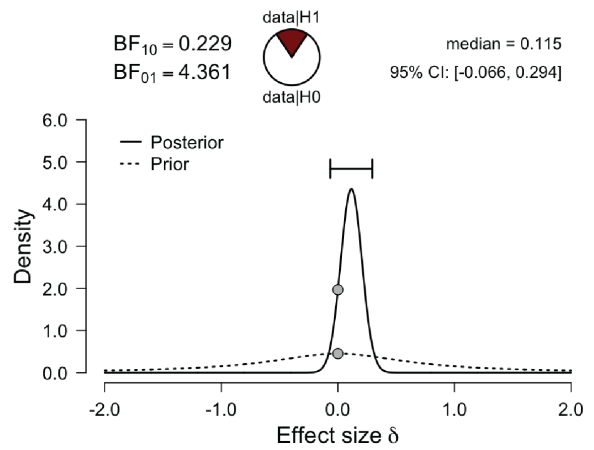

*Figure S10.* Prior and posterior plots for the Spatial Imagery component of the OSIQ, and the Spatial Memory component of the SAM. Data shows Mann-Whitney 2-sided t-tests, Cauchy = .707



Table S1

*Table of demographic characteristics of study samples*

|                                            | Aph <sup>a</sup><br><i>N</i> = 267 | C1 <sup>b</sup><br><i>N</i> = 203 | C2 <sup>c</sup><br><i>N</i> = 193 |
|--------------------------------------------|------------------------------------|-----------------------------------|-----------------------------------|
| <b>Age (SD) in years</b>                   | 33.97 (12.44)                      | 33.82 (9.33)                      | 19.33 (3.69)                      |
| <b>Age Range in years</b>                  | 17 – 75                            | 20 – 70                           | 17 – 55                           |
| <b>Gender (N, %)</b>                       |                                    |                                   |                                   |
| Female                                     | 129 (48.31)                        | 71 (34.98)                        | 140 (72.54)                       |
| Male                                       | 109 (40.82)                        | 131 (64.53)                       | 53 (27.46)                        |
| Undisclosed                                | 29 (10.86)                         | 1 (.49)                           | –                                 |
| <b>Ethnicity (N, %)</b>                    |                                    |                                   |                                   |
| White/Caucasian                            | 234 (87.65)                        | 121 (59.61)                       | 37 (19.17)                        |
| Asian                                      | 6 (2.25)                           | 16 (7.88)                         | 115 (59.56)                       |
| Indian                                     | 1 (.37)                            | 41 (20.20)                        | 14 (7.25)                         |
| African American                           | –                                  | 13 (6.40)                         | –                                 |
| Hispanic                                   | 5 (1.87)                           | 8 (3.94)                          | –                                 |
| Arab/Middle East.                          | 2 (.75)                            | –                                 | 8 (4.12)                          |
| Indigenous Aus.                            | –                                  | –                                 | 1 (.52)                           |
| Other/Mixed                                | 14 (5.24)                          | 3 (1.48)                          | 6 (3.12)                          |
| <b>English 1<sup>st</sup> Lang. (N, %)</b> |                                    |                                   |                                   |
| Yes                                        | 220 (82.40)                        | 181 (89.16)                       | 145 (75.13)                       |
| No                                         | 47 (17.60)                         | 22 (10.84)                        | 48 (24.87)                        |
| <b>Clinical History (N, %)</b>             |                                    |                                   |                                   |
| Mental illness or<br>Psychopathology       | 64 (23.97)                         | 34 (16.75)                        | 24 (12.44)                        |
| Epilepsy or seizures                       | 3 (1.12)                           | 17 (8.37)                         | 1 (.52)                           |
| Neurological condition                     | 11 (4.12)                          | 14 (6.90)                         | 24 (1.04)                         |
| Head injury or trauma                      | 24 (8.99)                          | 19 (9.36)                         | 2 (1.04)                          |
| Stroke                                     | 2 (.75)                            | 12 (5.91)                         | 1 (.52)                           |

<sup>a</sup> Aphantasic participants

<sup>b</sup> Control group 1 (MTurk participants)

<sup>c</sup> Control group 2 (Undergraduates)



Table S2  
Table of imagery results by control group comparison

| Variable<br>(Scale)                            | Control group 1 (MTurk) vs. Aphantasics <sup>a</sup> |                        |          |          |                      | Control group 2 (undergrads) vs. Aphantasics <sup>b</sup> |                        |          |          |                     |
|------------------------------------------------|------------------------------------------------------|------------------------|----------|----------|----------------------|-----------------------------------------------------------|------------------------|----------|----------|---------------------|
|                                                | Mean<br>score<br>(C1)                                | Mean<br>score<br>(Aph) | <i>U</i> | <i>p</i> | BF <sub>10</sub>     | Mean<br>score<br>(C2)                                     | Mean<br>score<br>(Aph) | <i>U</i> | <i>p</i> | BF <sub>10</sub>    |
| Visual<br>imagery<br>(VVIQ)                    | 58.12                                                | 17.94                  | 427.5    | .000*    | 1.41 e <sup>12</sup> | 58.79                                                     | 17.94                  | 255.5    | .000*    | 3.95e <sup>10</sup> |
| Object<br>imagery<br>(OSIQ)                    | 51.65                                                | 20.70                  | 372.0    | .000*    | 446,931.23           | 49.40                                                     | 20.70                  | 452.0    | .000*    | 4.08e <sup>7</sup>  |
| Multi-<br>sensory<br>imagery<br>total<br>(QMI) | 184.39                                               | 69.45                  | 1,868.5  | .000*    | 6.47e <sup>12</sup>  | 184.90                                                    | 69.45                  | 2,002.5  | .000*    | 6.24e <sup>18</sup> |
| Visual<br>imagery<br>(QMI)                     | 24.84                                                | 5.85                   | 620.5    | .000*    | 1.07e <sup>9</sup>   | 25.70                                                     | 5.85                   | 282.0    | .000*    | 1.42e <sup>8</sup>  |
| Auditory<br>imagery<br>(QMI)                   | 27.47                                                | 12.13                  | 6,152.5  | .000*    | 5.01e <sup>11</sup>  | 27.32                                                     | 12.13                  | 6,185.5  | .000*    | 4.04e <sup>9</sup>  |
| Tactile<br>imagery<br>(QMI)                    | 25.85                                                | 9.85                   | 4,473.5  | .000*    | 4.90e <sup>9</sup>   | 25.91                                                     | 9.85                   | 4,296.0  | .000*    | 1.34e <sup>10</sup> |
| Kinesthetic<br>imagery<br>(QMI)                | 26.80                                                | 11.25                  | 5,151.0  | .000*    | 1.04e <sup>11</sup>  | 27.22                                                     | 11.25                  | 4,734.5  | .000*    | 5.27e <sup>14</sup> |
| Taste<br>imagery<br>(QMI)                      | 27.15                                                | 8.94                   | 3,069.5  | .000*    | 4.82e <sup>26</sup>  | 26.27                                                     | 8.94                   | 3,663.5  | .000*    | 8.18e <sup>11</sup> |
| Olfactory<br>imagery<br>(QMI)                  | 24.97                                                | 8.51                   | 3,439.5  | .000*    | 2.73e <sup>9</sup>   | 24.51                                                     | 8.51                   | 3,756.5  | .000*    | 1.27e <sup>9</sup>  |
| Emotion<br>imagery<br>(QMI)                    | 27.31                                                | 12.92                  | 6,670.5  | .000*    | 4.81e <sup>12</sup>  | 27.96                                                     | 12.92                  | 5,999.5  | .000*    | 3.09e <sup>9</sup>  |

Note: Data shows mean scores on each comparison variable (for directional interpretation), results of 2-sided Mann-Whitney tests (Mann-Whitney *U*, *p* value), and Bayes factors.

<sup>a</sup> Aphantasic participants compared to control group 1 (MTurk participants)

<sup>b</sup> Aphantasic participants compared to control group 2 (Undergraduates)

\*  $p < 0.0002$      $\hat{p} < 0.01$

Table S3  
 Table of memory results by control group comparison

| Variable<br>(Scale)           | <u>Control group 1 (MTurk) vs. Aphantasics<sup>a</sup></u> |                        |          |          |                     | <u>Control group 2 (undergrads) vs. Aphantasics<sup>b</sup></u> |                        |          |                   |                      |
|-------------------------------|------------------------------------------------------------|------------------------|----------|----------|---------------------|-----------------------------------------------------------------|------------------------|----------|-------------------|----------------------|
|                               | Mean<br>score<br>(C1)                                      | Mean<br>score<br>(Aph) | <i>U</i> | <i>p</i> | BF <sub>10</sub>    | Mean<br>score<br>(C2)                                           | Mean<br>score<br>(Aph) | <i>U</i> | <i>p</i>          | BF <sub>10</sub>     |
| Episodic<br>Imagery<br>(EMIQ) | 56.43                                                      | 20.83                  | 2,186.5  | .000*    | 1.01e <sup>15</sup> | 58.99                                                           | 20.83                  | 1,488.5  | .000*             | 3.997e <sup>14</sup> |
| Episodic<br>Memory<br>(SAM)   | 102.82                                                     | 84.92                  | 8,865.0  | .000*    | 4.68e <sup>10</sup> | 98.85                                                           | 84.92                  | 10,081.0 | .000*             | 2.09e <sup>8</sup>   |
| Future<br>Imagery<br>(SAM)    | 94.02                                                      | 80.42                  | 7,469.5  | .000*    | 2.97e <sup>10</sup> | 93.48                                                           | 80.42                  | 7,902.5  | .000*             | 2.36e <sup>13</sup>  |
| Factual<br>Memory<br>(SAM)    | 99.76                                                      | 93.16                  | 18,601.5 | .000*    | 156,732.50          | 95.39                                                           | 93.16                  | 21,496.0 | .002 <sup>^</sup> | 3.196                |

*Note:* Data shows mean scores on each comparison variable (for directional interpretation), results of 2-sided Mann-Whitney tests (Mann-Whitney *U*, *p* value), and Bayes factors.

<sup>a</sup> Aphantasic participants compared to control group 1 (MTurk participants)

<sup>b</sup> Aphantasic participants compared to control group 2 (Undergraduates)

\**p* < 0.0002    <sup>^</sup>*p* < 0.01

Table S4  
 Table of trauma response results by control group comparison

| Variable (Scale)                    | Control group 1 (MTurk) vs. Aphantasics <sup>a</sup> |                  |          |                   |                  | Control group 2 (undergrads) vs. Aphantasics <sup>b</sup> |                  |          |                   |                    |
|-------------------------------------|------------------------------------------------------|------------------|----------|-------------------|------------------|-----------------------------------------------------------|------------------|----------|-------------------|--------------------|
|                                     | Mean score (C1)                                      | Mean score (Aph) | <i>U</i> | <i>p</i>          | BF <sub>10</sub> | Mean score (C2)                                           | Mean score (Aph) | <i>U</i> | <i>p</i>          | BF <sub>10</sub>   |
| Trauma response total (PCL-5)       | 25.01                                                | 23.50            | 27,515.0 | .776              | .12              | 28.80                                                     | 23.50            | 21,464.0 | .002 <sup>^</sup> | 12.76              |
| Memory intrusions (PCL-5)           | 6.01                                                 | 3.98             | 22,739.0 | .002 <sup>^</sup> | 14.85            | 7.42                                                      | 3.98             | 15,134.5 | .000 <sup>*</sup> | 2.20e <sup>7</sup> |
| Avoidance (PCL-5)                   | 2.91                                                 | 2.21             | 23,164.5 | .006 <sup>^</sup> | 2.13             | 3.36                                                      | 2.21             | 18,494.5 | .000 <sup>*</sup> | 2494.667           |
| Negative cognition and mood (PCL-5) | 8.81                                                 | 10.34            | 30,960.0 | .008 <sup>^</sup> | 12.99            | 10.17                                                     | 10.34            | 25,827.5 | .965              | .108               |
| Arousal and reactivity (PCL-5)      | 7.29                                                 | 6.97             | 27,240.0 | .924              | .11              | 7.85                                                      | 6.97             | 23,517.0 | .109              | .336               |

Note: Data shows mean scores on each comparison variable (for directional interpretation), results of 2-sided Mann-Whitney tests (Mann-Whitney *U*, *p* value), and Bayes factors.

<sup>a</sup> Aphantasic participants compared to control group 1 (MTurk participants)

<sup>b</sup> Aphantasic participants compared to control group 2 (Undergraduates)

\**p* < 0.0002    <sup>^</sup>*p* < 0.01

Table S5

Table of dreaming and mind-wandering results by control group comparison

| Variable (Scale)                | Control group 1 (MTurk) vs. Aphantasics <sup>a</sup> |                  |          |                   |                    | Control group 2 (undergrads) vs. Aphantasics <sup>b</sup> |                  |          |                   |                    |
|---------------------------------|------------------------------------------------------|------------------|----------|-------------------|--------------------|-----------------------------------------------------------|------------------|----------|-------------------|--------------------|
|                                 | Mean score (C1)                                      | Mean score (Aph) | <i>U</i> | <i>p</i>          | BF <sub>10</sub>   | Mean score (C2)                                           | Mean score (Aph) | <i>U</i> | <i>p</i>          | BF <sub>10</sub>   |
| Day Dream (IPI)                 | 2.84                                                 | 2.60             | 23,001.5 | .005 <sup>^</sup> | 1.93               | 3.04                                                      | 2.60             | 19,271.5 | .000 <sup>*</sup> | 397.038            |
| Night Dream (IPI)               | 3.15                                                 | 2.42             | 15,828.5 | .000 <sup>*</sup> | 4.24e <sup>6</sup> | 2.99                                                      | 2.42             | 17,156.0 | .000 <sup>*</sup> | 21124.163          |
| Dream Sensory (SERS)            | 2.23                                                 | 1.49             | 15,087.5 | .000 <sup>*</sup> | 5.46e <sup>6</sup> | 3.67                                                      | 1.49             | 3,536.5  | .000 <sup>*</sup> | 6.49e <sup>8</sup> |
| Dream Affective (SERS)          | 1.83                                                 | 1.60             | 23,463.0 | .013              | 9.01               | 3.00                                                      | 1.60             | 4,161.5  | .000 <sup>*</sup> | 3.85e <sup>8</sup> |
| Dream Cognitive (SERS)          | 2.06                                                 | 1.89             | 24,592.0 | .085              | 1.05               | 4.67                                                      | 1.89             | 1,997.0  | .000 <sup>*</sup> | 1.56e <sup>7</sup> |
| Dream Spatial Complexity (SERS) | 2.08                                                 | 1.88             | 24,697.0 | .092              | 0.31               | 4.95                                                      | 1.88             | 4,173.5  | .000 <sup>*</sup> | 2.15e <sup>7</sup> |
| Dream Perspective (SERS)        | 1.29                                                 | 1.08             | 22,070.5 | .000 <sup>^</sup> | 127.28             | 4.11                                                      | 1.08             | 858.0    | .000 <sup>*</sup> | 2.51e <sup>7</sup> |
| Dream Lucidity (SERS)           | .92                                                  | .66              | 19,473.0 | .000 <sup>*</sup> | 1902.01            | 3.38                                                      | .66              | 1,266.5  | .000 <sup>*</sup> | 2.44e <sup>7</sup> |

Note: Data shows mean scores on each comparison variable (for directional interpretation), results of 2-sided Mann-Whitney tests (Mann-Whitney *U*, *p* value), and Bayes factors.

<sup>a</sup> Aphantasic participants compared to control group 1 (MTurk participants)

<sup>b</sup> Aphantasic participants compared to control group 2 (Undergraduates)

\*  $p < 0.0002$     <sup>^</sup> $p < 0.01$

Table S6

Table of spatial imagery results by control group comparison

| Variable<br>(Scale)          | <u>Control group 1 (MTurk) vs. Aphantasics<sup>a</sup></u> |                        |          |                   |                  | <u>Control group 2 (undergrads) vs. Aphantasics<sup>b</sup></u> |                        |          |          |                  |
|------------------------------|------------------------------------------------------------|------------------------|----------|-------------------|------------------|-----------------------------------------------------------------|------------------------|----------|----------|------------------|
|                              | Mean<br>score<br>(C1)                                      | Mean<br>score<br>(Aph) | <i>U</i> | <i>p</i>          | BF <sub>10</sub> | Mean<br>score<br>(C2)                                           | Mean<br>score<br>(Aph) | <i>U</i> | <i>p</i> | BF <sub>10</sub> |
| Spatial<br>imagery<br>(OSIQ) | 43.46                                                      | 40.14                  | 22,462.0 | .001 <sup>^</sup> | 14.65            | 41.74                                                           | 40.14                  | 22,635.5 | .026     | .883             |
| Spatial<br>memory<br>(SAM)   | 93.12                                                      | 90.95                  | 24,720.0 | .103              | .23              | 92.36                                                           | 90.95                  | 23,760.5 | .154     | .229             |

*Note:* Data shows mean scores on each comparison variable (for directional interpretation), results of 2-sided Mann-Whitney tests (Mann-Whitney *U*, *p* value), and Bayes factors.

<sup>a</sup> Aphantasic participants compared to control group 1 (MTurk participants)

<sup>b</sup> Aphantasic participants compared to control group 2 (Undergraduates)

\**p* < 0.0002    <sup>^</sup>*p* < 0.01

Table S7  
*Table of effect sizes by control group comparison*

| Variable (Scale)                  | <u>Control group 1 (MTurk) vs. Aphantasics<sup>a</sup></u> |          | <u>Control group 2 (Undergrad) vs. Aphantasics<sup>b</sup></u> |          |
|-----------------------------------|------------------------------------------------------------|----------|----------------------------------------------------------------|----------|
|                                   | <i>Z</i>                                                   | <i>r</i> | <i>Z</i>                                                       | <i>r</i> |
| <b>Imagery</b>                    |                                                            |          |                                                                |          |
| Visual imagery (VVIQ)             | -18.914                                                    | 0.8724   | -18.784                                                        | 0.8758   |
| Object imagery (OSIQ)             | -18.344                                                    | 0.8461   | -18.010                                                        | 0.8397   |
| Multi-sensory imagery total (QMI) | -17.328                                                    | 0.7993   | -16.921                                                        | 0.7889   |
| Visual imagery (QMI)              | -18.963                                                    | 0.8747   | -18.962                                                        | 0.8841   |
| Auditory imagery (QMI)            | -14.512                                                    | 0.6694   | -14.080                                                        | 0.6565   |
| Tactile imagery (QMI)             | -15.789                                                    | 0.7283   | -15.554                                                        | 0.7252   |
| Kinesthetic imagery (QMI)         | -15.234                                                    | 0.7027   | -15.148                                                        | 0.7063   |
| Taste imagery (QMI)               | -16.887                                                    | 0.7789   | -16.158                                                        | 0.7534   |
| Olfactory imagery (QMI)           | -16.678                                                    | 0.7693   | -16.128                                                        | 0.7520   |
| Emotion imagery (QMI)             | -14.100                                                    | 0.6504   | -14.151                                                        | 0.6598   |
| <b>Memory</b>                     |                                                            |          |                                                                |          |
| Episodic Imagery (EMIQ)           | -17.517                                                    | 0.8080   | -17.700                                                        | 0.8253   |

|                                     |         |        |         |        |
|-------------------------------------|---------|--------|---------|--------|
| Episodic Memory (SAM)               | -12.509 | 0.5770 | -11.152 | 0.5200 |
| Future Imagery (SAM)                | -13.667 | 0.6304 | -12.926 | 0.6027 |
| Factual Memory (SAM)                | -5.827  | 0.2688 | -3.035  | 0.1415 |
| <b>Trauma Response</b>              |         |        |         |        |
| Trauma response total (PCL-5)       | .284    | 0.0131 | -3.058  | 0.1426 |
| Memory intrusions (PCL-5)           | -3.026  | 0.1396 | -7.593  | 0.3540 |
| Avoidance (PCL-5)                   | -2.757  | 0.1272 | -5.244  | 0.2445 |
| Negative cognition and mood (PCL-5) | 2.652   | 0.1223 | .044    | 0.0021 |
| Arousal and reactivity (PCL-5)      | .096    | 0.0044 | -1.601  | 0.0746 |
| <b>Day Dream</b>                    |         |        |         |        |
| Day Dream (IPI)                     | -2.811  | 0.1297 | -4.616  | 0.2152 |
| Night Dream (IPI)                   | -7.731  | 0.3566 | -6.120  | 0.2853 |
| <b>Night Dream</b>                  |         |        |         |        |
| Dream Sensory (SERS)                | -8.240  | 0.3801 | -15.802 | 0.7368 |
| Dream Affective (SERS)              | -2.496  | 0.1151 | -15.360 | 0.7162 |

|                                 |        |        |         |        |
|---------------------------------|--------|--------|---------|--------|
| Dream Cognitive (SERS)          | -1.721 | 0.0794 | -16.896 | 0.7878 |
| Dream Spatial Complexity (SERS) | -1.685 | 0.0777 | -15.502 | 0.7228 |
| Dream Perspective (SERS)        | -3.551 | 0.1638 | -17.832 | 0.8314 |
| Dream Lucidity (SERS)           | -5.454 | 0.2516 | -17.641 | 0.8225 |
| <b>Spatial Ability</b>          |        |        |         |        |
| Spatial imagery (OSIQ)          | -3.182 | 0.1468 | -2.226  | 0.1038 |
| Spatial memory (SAM)            | -1.633 | 0.0753 | -1.425  | 0.0664 |

*Note:* Data shows standardized  $Z$  scores from Mann-Whitney  $U$  non-parametric tests, and effect sizes  $r$  (for derivation, see Statistical Analyses in Method).

<sup>a</sup> Aphantasic participants compared to control group 1 (MTurk participants)

<sup>b</sup> Aphantasic participants compared to control group 2 (Undergraduates)



Table S8

*Table of within-group differences as a function of mental illness history in aphantasic sample*

| Variable<br>(Scale)                        | Mean score<br>(Aph no MIH <sup>b</sup> )<br>N = 203 | Mean score<br>(Aph with MIH <sup>a</sup> )<br>N = 64 | U       | p    |
|--------------------------------------------|-----------------------------------------------------|------------------------------------------------------|---------|------|
| <b>Imagery</b>                             |                                                     |                                                      |         |      |
| Visual imagery<br>(VVIQ)                   | 17.87                                               | 18.16                                                | 6,766.5 | .535 |
| Object imagery<br>(OSIQ)                   | 20.46                                               | 21.45                                                | 7,234.5 | .168 |
| Multi-sensory<br>imagery<br>total<br>(QMI) | 68.19                                               | 73.47                                                | 6,776.5 | .599 |
| Visual imagery<br>(QMI)                    | 5.87                                                | 5.77                                                 | 6,180.5 | .434 |
| Auditory<br>imagery<br>(QMI)               | 12.14                                               | 12.13                                                | 6,400.5 | .851 |
| Tactile imagery<br>(QMI)                   | 9.45                                                | 11.11                                                | 6,810.5 | .518 |
| Kinesthetic<br>imagery<br>(QMI)            | 11.31                                               | 11.06                                                | 6,357.5 | .783 |
| Taste imagery<br>(QMI)                     | 8.76                                                | 9.52                                                 | 6,876.0 | .413 |
| Olfactory<br>imagery<br>(QMI)              | 8.17                                                | 9.61                                                 | 6,932.5 | .337 |
| Emotion<br>imagery<br>(QMI)                | 12.49                                               | 14.28                                                | 7,099.5 | .247 |
| <b>Memory</b>                              |                                                     |                                                      |         |      |
| Episodic<br>Imagery<br>(EMIQ)              | 20.44                                               | 22.06                                                | 6,734.0 | .609 |

|                                     |       |       |         |       |
|-------------------------------------|-------|-------|---------|-------|
| Episodic Memory (SAM)               | 85.22 | 84.00 | 5,734.5 | .157  |
| Future Imagery (SAM)                | 80.46 | 80.31 | 6,074.5 | .405  |
| Factual Memory (SAM)                | 93.17 | 93.13 | 6,592.0 | .859  |
| <b>Trauma Response</b>              |       |       |         |       |
| Trauma response total (PCL-5)       | 20.20 | 33.97 | 9,329.0 | .000* |
| Memory intrusions (PCL-5)           | 3.44  | 5.70  | 8,040.0 | .004^ |
| Avoidance (PCL-5)                   | 1.88  | 3.27  | 8,279.0 | .001^ |
| Negative cognition and mood (PCL-5) | 8.88  | 15.00 | 9,416.0 | .000* |
| Arousal and reactivity (PCL-5)      | 6.01  | 10.00 | 9,118.0 | .000* |
| <b>Day Dream</b>                    |       |       |         |       |
| Day Dream (IPI)                     | 2.47  | 3.00  | 8,206.0 | .001^ |
| Night Dream (IPI)                   | 2.33  | 2.68  | 7,838.0 | .013  |
| <b>Night Dream</b>                  |       |       |         |       |
| Dream Sensory (SERS)                | 1.45  | 1.64  | 7,089.0 | .271  |
| Dream Affective (SERS)              | 1.57  | 1.71  | 7,317.0 | .127  |

|                                 |       |       |         |      |
|---------------------------------|-------|-------|---------|------|
| Dream Cognitive (SERS)          | 1.88  | .95   | 6,528.0 | .953 |
| Dream Spatial Complexity (SERS) | 1.79  | 2.16  | 7,448.0 | .071 |
| Dream Perspective (SERS)        | 1.02  | 1.26  | 7,801.0 | .013 |
| Dream Lucidity (SERS)           | .65   | .70   | 6,830.0 | .518 |
| <b>Spatial Ability</b>          |       |       |         |      |
| Spatial imagery (OSIQ)          | 40.32 | 39.56 | 6,498.5 | .996 |
| Spatial memory (SAM)            | 91.63 | 88.78 | 5,975.5 | .334 |

*Note:* Data shows results of 2-sided Mann-Whitney tests (Mann-Whitney  $U$ ,  $p$  value) comparing aphantasic participants with mental illness history to aphantasic participants without mental illness history (split sample, within-group analysis).

<sup>a</sup> Aphantasic participants with a reported history of mental illness or psychopathology

<sup>b</sup> Aphantasic participants with no reported history of mental illness or psychopathology

\*  $p < 0.0002$      $\hat{p} < 0.01$
